# Supplementary material for: Gut microbiota can transfer fiber characteristics and lipid metabolic profiles of skeletal muscle from pigs to germ-free mice
Source: Springer Nature journal article supplement (doi:10.1038/srep31786), 2016-08-22
Supplement: 41598_2016_BFsrep31786_MOESM1_ESM.pdf [file 41598_2016_BFsrep31786_MOESM1_ESM.pdf]

1 **Gut microbiota can transfer fiber characteristics and lipid metabolic profile of**  
2 **skeletal muscle from pigs to germ free mice**

3  
4 Honglin Yan<sup>1a</sup>, Hui Diao<sup>1a</sup>, Yi Xiao<sup>1a</sup>, Wenxia Li<sup>1b</sup>, Bing Yu<sup>a</sup>, Jun He<sup>a</sup>, Jie Yu<sup>a</sup>, Ping  
5 Zheng<sup>a</sup>, Xiangbing Mao<sup>a</sup>, Yuheng Luo<sup>a</sup>, Benhua Zeng<sup>b</sup>, Hong Wei<sup>b\*</sup>, Daiwen Chen<sup>a\*</sup>

6  
7 <sup>a</sup>Animal Nutrition Institute, Sichuan Agricultural University, Key Laboratory of Animal  
8 Disease-Resistance Nutrition, Ministry of Education, China, Ya'an 625014, People's  
9 Republic of China

10 <sup>b</sup>Department of Laboratory Animal Science, College of Basic Medical Sciences Third  
11 Military Medical University, 30 Gaotanyan Street, Chongqing 400038, China

12  
13 <sup>1</sup>Honglin Yan, Hui Diao, Yi Xiao and Wenxia Li contributed equally to this work.

14 \*Correspondence to: Professor Daiwen Chen, Animal Nutrition Institute, Sichuan  
15 Agricultural University, Xinkang Road 46#, Ya'an, Sichuan Province, People's  
16 Republic of China, 625014; [dwchen@sicau.edu.cn](mailto:dwchen@sicau.edu.cn); or Professor Hong Wei,  
17 Department of Laboratory Animal Science, College of Basic Medical Sciences Third  
18 Military Medical University, 30 Gaotanyan Street, Chongqing 400038, China;  
19 [weihong63528@163.com](mailto:weihong63528@163.com).

## Supporting information

Table S1 Raw reads, sequences and OTUs among four groups

| Group | Raw reads | High quality sequences | OTUs |
|-------|-----------|------------------------|------|
| YP    | 289739    | 281318                 | 1224 |
| RP    | 294033    | 287930                 | 1381 |
| YM    | 5521883   | 5138823                | 3138 |
| RM    | 5538960   | 5291622                | 3382 |

YP, Yorkshire pigs; RP, Rongchang pigs. YM, Yorkshire pig fecal microbiota-associated mice; RM, Rongchang pig fecal microbiota-associated mice; OTUs, operational taxonomic units.

Table S2 Feed ingredients and nutrient content of diet

| Ingredients, %                          | content | Nutrient level <sup>a</sup> | content |
|-----------------------------------------|---------|-----------------------------|---------|
| Corn                                    | 78.20   | Digestible energy, Mcal/kg  | 3.40    |
| Soybean meal                            | 14.60   | Crude protein, %            | 15.74   |
| Soybean oil                             | 1.00    | Ca, %                       | 0.52    |
| Fish meal                               | 4.50    | Total P, %                  | 0.50    |
| Limestone                               | 0.35    | Available P, %              | 0.32    |
| Dicalcium phosphate                     | 0.27    | Digestible lysine, %        | 0.98    |
| Salt                                    | 0.25    | Digestible Met, %           | 0.35    |
| <i>L</i> -Lys HCl                       | 0.34    | Digestible Met + Cys, %     | 0.55    |
| <i>DL</i> -Met                          | 0.10    | Digestible Thr, %           | 0.59    |
| Thr (98.5%)                             | 0.07    | Digestible Trp, %           | 0.17    |
| Trp(98.00%)                             | 0.02    |                             |         |
| Chloride choline                        | 0.05    |                             |         |
| Vitamin and mineral premix <sup>b</sup> | 0.20    |                             |         |

<sup>a</sup> All data were calculated values.

<sup>b</sup> Provided the following (mg/kg diet): Fe, 120 mg; Cu, 17 mg; Zn, 120 mg; Mn, 25 mg; Se, 0.20 mg; I, 0.30 mg; vitamin A, 5512 IU; vitamin D<sub>3</sub>, 2250 IU; vitamin E, 24 IU; vitamin K<sub>3</sub>, 3 IU; vitamin B<sub>12</sub>, 0.02 mg; folic acid, 1.20 mg; riboflavin, 6 mg; nicotinic acid, 20 mg; pantothenic acid, 15 mg; biotin, 0.15 mg.

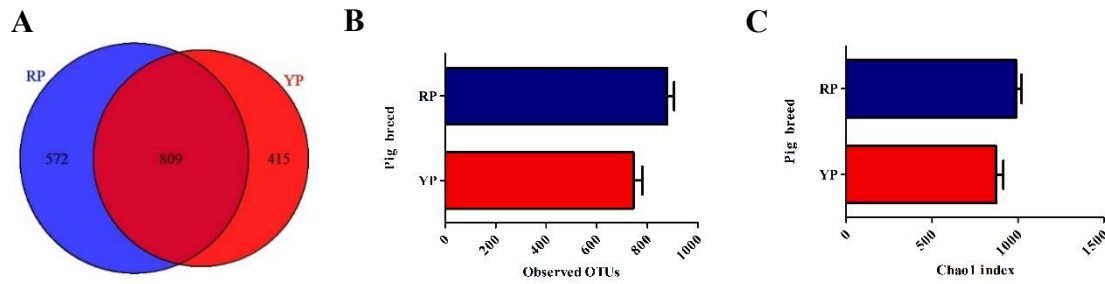

32

33 Fig. S1 comparison of the OTUs in the two pig breed. The number of observed OTUs sharing  $\geq 97\%$   
 34 sequence similarity. (A) A Venn diagram was generated to describe the common and unique OTUs  
 35 between the two pig breed. (B) From the numbers of OTUs in the two pig breed, there was no  
 36 difference between YP and RP. (C) The bacterial abundance is reflected in Chao1 index; there was  
 37 no difference in Chao1 between pig breeds. YP, Yorkshire pigs; RP, Rongchang pigs.

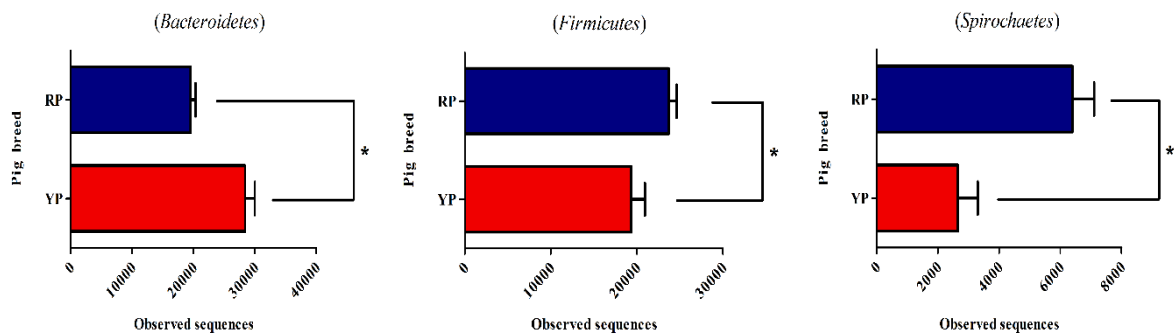

38 Fig. S2 The bacterial abundances of 3 distinct phyla significantly differ between the two pig breeds.  
 39 YP, Yorkshire pigs; RP, Rongchang pigs. \*  $P < 0.05$ .

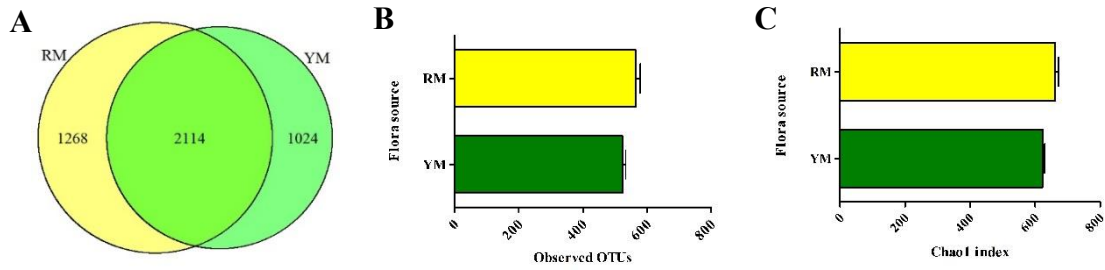

40

41 Figure S3. comparison of the OTUs between YP flora-associated mice (YM) and RP flora-associated mice (RM). The number of observed OTUs sharing  $\geq 97\%$  sequence similarity. (A) A Venn diagram was generated to describe the common and unique OTUs between YM and RM. (B) From the numbers of OTUs in the two groups, there was no difference between YM and RM. (C) The bacterial abundance is reflected in Chao1 index; there was no difference in Chao1 between mice recipients.

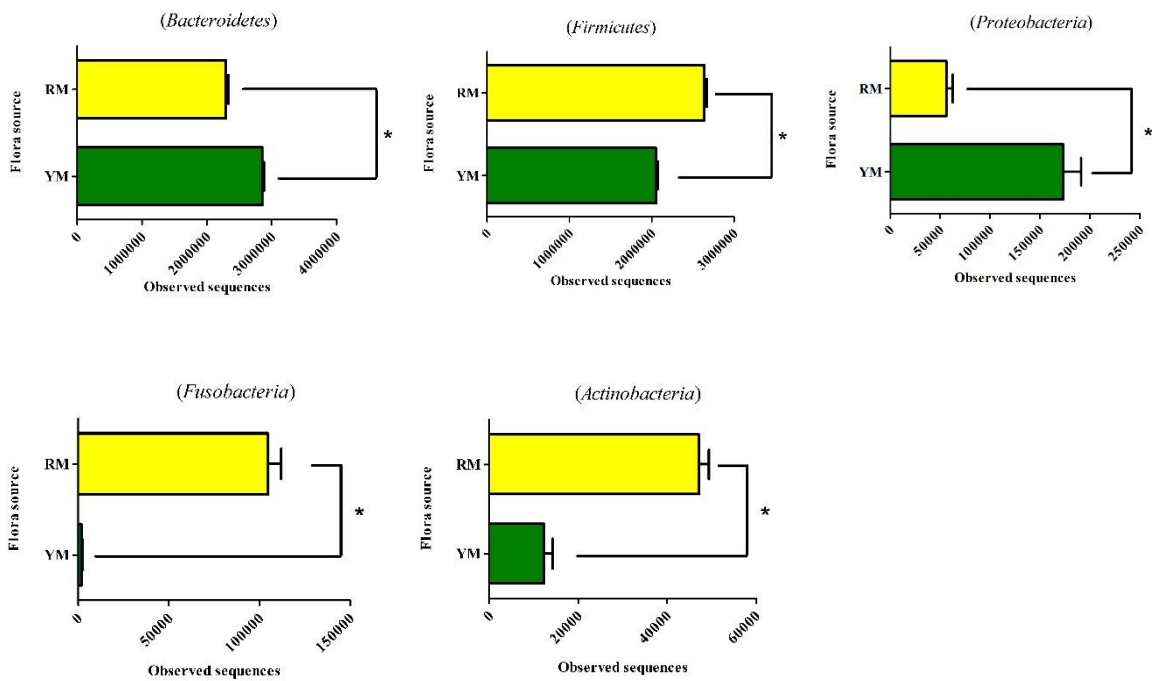

47 Figure S4. The bacterial abundances of 5 distinct phyla significantly differ between mice recipients.

48 YM, YP flora-associated mice; RM, RP flora-associated mice. \*  $P < 0.05$ .

49

50

51

52
